# Supplementary material
Source: PubMed Central journal article supplement (PMC3488352)
Supplement: NIHMS316517-supplement-Supplementary_Data.pdf [file NIHMS316517-supplement-Supplementary_Data.pdf]

Molecular Dynamics Simulation of Hydrated DPPC Monolayers Using Charge  
Equilibration Force Fields: Supporting Information

T.R. Lucas, B.A. Bauer, J.E. Davis, S. Patel

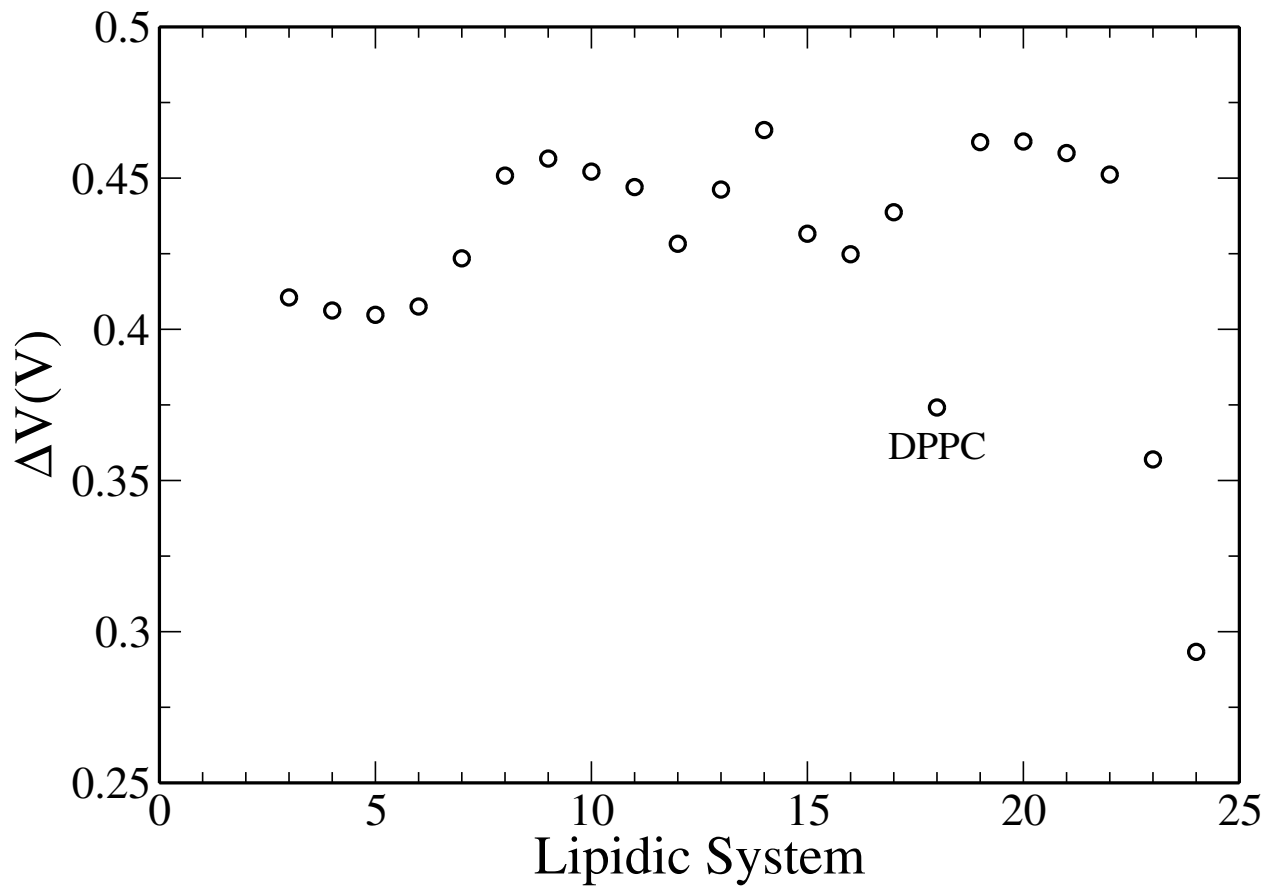

**Figure S1.** Experimentally determined surface potential shifts for various phosphacholine lipid monolayer systems at the argon-water interface, as reported by Smaby and Brockman [Smaby, J. M.; Brockman, H. L. *Biophys. J.* **1990**, *58*, 195 - 204.] The lipidic system number designation corresponds to the row in which the lipid is presented in Table 1 of Smaby and Brockman with the experimentally comparable DPPC system explicitly labeled.

---
